# Supplementary material for: Natural products triptolide, celastrol, and withaferin A inhibit the chaperone activity of peroxiredoxin I
Source: PubMed Central journal article supplement — Chem Sci. 2015 May 19;6(7):4124–30. doi: 10.1039/c5sc00633c (PMC5497274; doi:10.1039/c5sc00633c), 2015-05-19
Supplement: SC-006-C5SC00633C-s001.pdf [file SC-006-C5SC00633C-s001.pdf]

## Supporting Information

Qian Zhao,<sup>a</sup> Yu Ding,<sup>b</sup> Zhangshuang Deng,<sup>c</sup> On-Yi Lee,<sup>a</sup> Peng Gao,<sup>d</sup> Pin Chen,<sup>a</sup> Rebecca J. Rose,<sup>e</sup> Hong Zhao,<sup>f</sup> Zhehao Zhang,<sup>a</sup> Xin-Pei Tao,<sup>a</sup> Albert J.R. Heck,<sup>e</sup> Richard Kao<sup>d</sup> and Dan Yang<sup>\*a</sup>

<sup>a</sup> Morningside Laboratory for Chemical Biology, Department of Chemistry, The University of Hong Kong, Hong Kong, China.

<sup>b</sup> School of Life Sciences, Fudan University, Shanghai, China.

<sup>c</sup> Hubei Key Laboratory of Natural Product Research and Development, College of Biological and Pharmaceutical Sciences, China Three Gorges University, Yichang, P. R. China

<sup>d</sup> Department of Microbiology, The University of Hong Kong, Hong Kong, China.

<sup>e</sup> Bijvoet Center for Biomolecular Research and Utrecht Institute for Pharmaceutical Sciences, Utrecht University; Netherlands Proteomics Centre, the Netherlands.

<sup>f</sup> Department of Chemistry, The Chinese University of Hong Kong, Hong Kong, China.

\*Corresponding author E-mail: yangdan@hku.hk

## Table of Contents

|                                                                                                                    |    |
|--------------------------------------------------------------------------------------------------------------------|----|
| Table of Contents.....                                                                                             | 1  |
| Chemical Synthesis and Characterization of Triptolide Probes.....                                                  | 3  |
| General Methods and Materials.....                                                                                 | 17 |
| Supplementary Data.....                                                                                            | 22 |
| <b>Figure S1.</b> Silver stained gels of pull-down products of Biotin-TL using HeLa, HCT116 and HEK293T cells..... | 22 |
| <b>Figure S2.</b> A silver stained gel of pull-down products of Biotin-TL in the absence or presence of TL. 23     |    |
| <b>Figure S3.</b> MALDI-TOF/MS analysis confirms the identity of 23-kDa protein as Prx I. ....                     | 24 |
| <b>Figure S4.</b> SDS-PAGE analysis of recombinant thioredoxin incubated with Cy3-TL. ....                         | 25 |

|                                                                                                                                                                                                                         |    |
|-------------------------------------------------------------------------------------------------------------------------------------------------------------------------------------------------------------------------|----|
| <b>Figure S5.</b> Triplicate western blot analyses of recombinant hPrx I and mutants after incubation with Biotin-TL.....                                                                                               | 26 |
| <b>Figure S6.</b> Kinetics curves show enzymatic activity of recombinant Prx I, in the presence or absence of TL or adenanthin. ....                                                                                    | 27 |
| <b>Figure S7.</b> Native mass spectrometry analysis on intact wildtype Prx I or mutants in absence or presence of Cel and WA.....                                                                                       | 28 |
| <b>Figure S8.</b> LC-MS/MS analysis of tryptic peptide $^{169}\text{HGEVC}^{\text{WA}}\text{PAGWKPGSDTIKPDVQK}^{190}$ from WA-treated Prx I. ....                                                                       | 29 |
| <b>Figure S9.</b> Aggregation of MDH in absence of Prx I and in presence of TL, Cel and WA as monitored by light scattering. ....                                                                                       | 30 |
| <b>Figure S10.</b> Monitoring aggregation of Prx I in absence of MDH and in presence of TL, Cel and WA by light scattering. ....                                                                                        | 31 |
| <b>Table S1.</b> Observed species in native mass spectrometry analysis of intact Prx I monomer and dimer in absence or presence of TL.....                                                                              | 31 |
| <b>Table S2.</b> HCD MS/MS analysis: a summary of the assigned fragment ion peaks in Figure 2a of a quaternary charged tryptic peptide, $^{169}\text{HGEVCTLPAGWKPGSDTIKPDVQK}^{190}$ , from the TL-treated Prx I. .... | 32 |
| <b>Table S3.</b> HCD MS/MS analysis: summary of the assigned fragment ion peaks in Figure 4d of a tryptic peptides, $^{79}\text{DSHFC}^{\text{WA}}\text{HLAWVNTPK}^{92}$ , from the WA-treated Prx I. ....              | 33 |
| <b>References</b> .....                                                                                                                                                                                                 | 33 |

## Chemical Synthesis and Characterization of Triptolide Probes

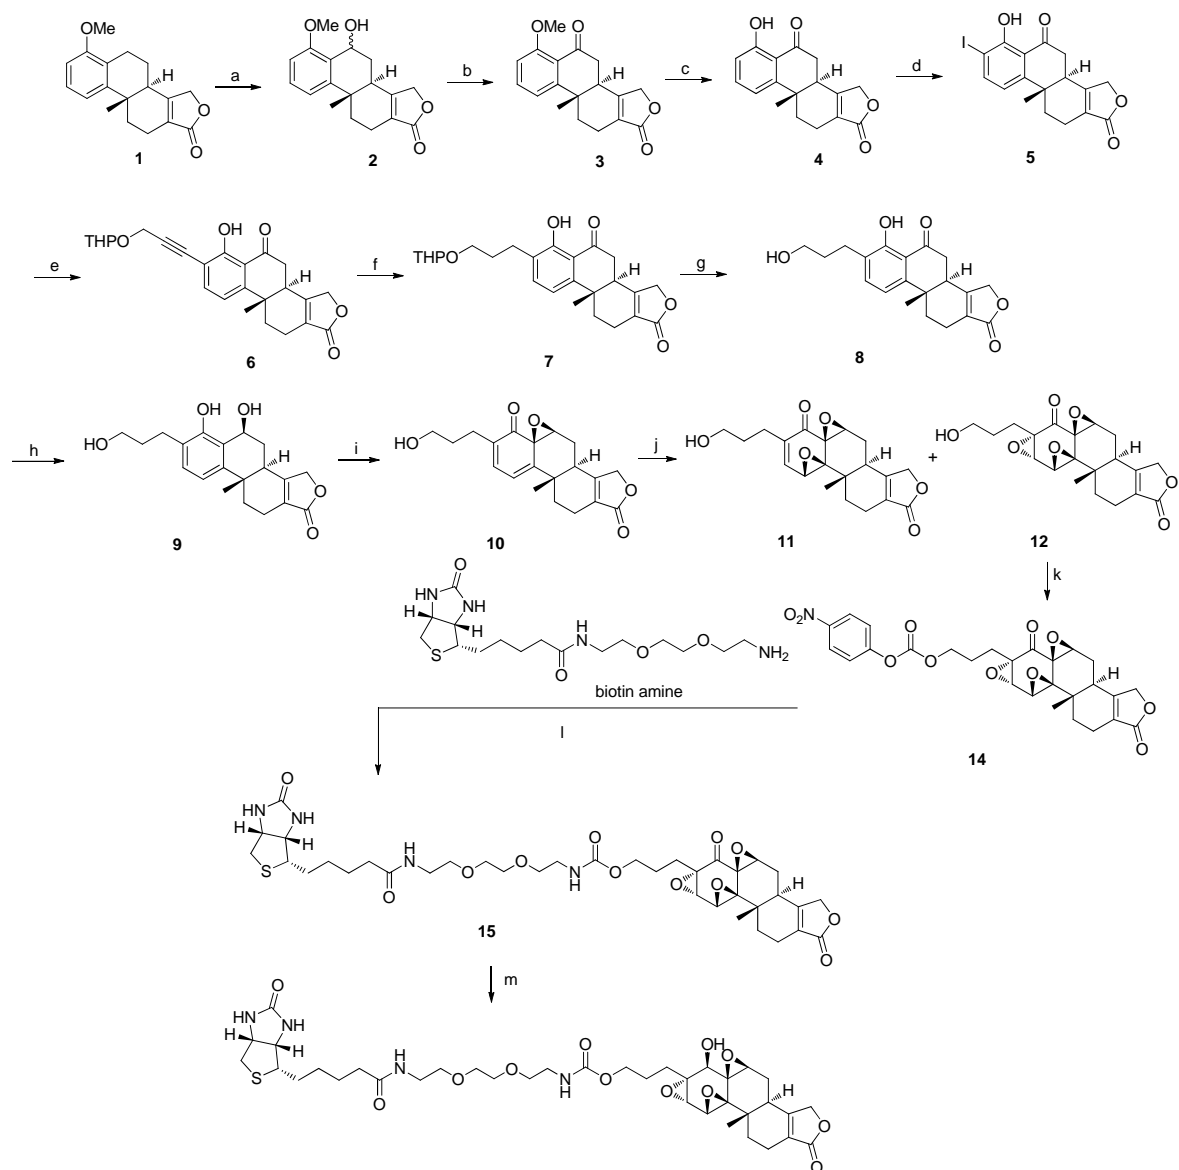

**Scheme S1.** Chemical synthesis of biotin-triptolide (Biotin-TL)

Reagents and conditions: a) cerium(VI) ammonium nitrate, MeCN, 0 °C, 99 %; b) IBX, acetone, reflux, 98 %; c) AlCl<sub>3</sub>, MeCN, reflux, 100 %; d) Sc(OTf)<sub>3</sub>, NIS, AcOH, rt, 82 %; e) THPOCH<sub>2</sub>C≡CH, PdCl<sub>2</sub>(PPh<sub>3</sub>)<sub>2</sub>, CuI, Et<sub>3</sub>N, THF, 35 °C, 97 %; f) H<sub>2</sub>, Pd/C, EtOH, 40-50 °C, 100 %; g) TsOH·H<sub>2</sub>O, MeOH, rt, 95 %; h) NaBH<sub>4</sub>, EtOH, CH<sub>2</sub>Cl<sub>2</sub>, 0 °C, 99 %; i) NaIO<sub>4</sub>, MeOH, H<sub>2</sub>O, rt, 80 %; j) CF<sub>3</sub>COCH<sub>3</sub>, OXONE, NaHCO<sub>3</sub>,

CH<sub>3</sub>CN, Na<sub>2</sub>(EDTA), 0 °C; k) *p*-nitrophenylchloroformate, pyridine, CH<sub>2</sub>Cl<sub>2</sub>, rt, the yield of **14** was 13% from **10**; l) DMAP, Et<sub>3</sub>N, CH<sub>2</sub>Cl<sub>2</sub>/MeOH, rt, 24 %; m) K-Selectride, THF, -40 °C, 39 %.

Biotin-amine used in step I was prepared according to procedure described in C. Gnaccarini *et al. Bioorg. Med. Chem.* 2009, 17, 6354-6359.

#### Preparation of Compound 2

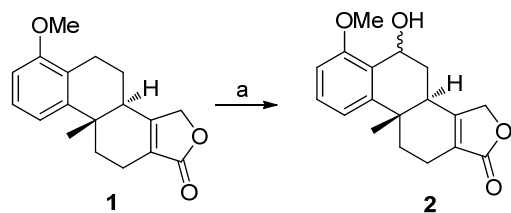

Compound **1** was synthesized in accordance with or by slight modification of the method disclosed in Gao, Q.; Xue, J.; Zheng, B.; Liu, R. (Shanghai Haoyuan Chemexpress Co., Ltd., P.R. China) Patent application: CN101638426 (2010) p. 13.

To a suspension of **1** (10.0 g, 35.2 mmol) in CH<sub>3</sub>CN (250 mL) was added ceric ammonium nitrate (CAN) solution (40.5 g in 25 mL water) dropwise at 0 °C over a period of 30 min. The resulting mixture turned transparent red, and was stirred for 30 min and monitored by TLC (EtOAc: Hexane = 3:7). When the starting material was consumed and the mixture turned yellow, Na<sub>2</sub>SO<sub>3</sub> solution (102 g Na<sub>2</sub>SO<sub>3</sub> in 300 mL H<sub>2</sub>O) was added. The mixture was stirred vigorously for 10 min and filtered through sand funnel. The filtrate was extracted with CH<sub>2</sub>Cl<sub>2</sub> (300 mL × 3), and the solid was washed with CH<sub>2</sub>Cl<sub>2</sub> (200 mL × 3). The combined organic layer was dried over anhydrous Na<sub>2</sub>SO<sub>4</sub> and filtered via a short pad of silica gel. After the solvent was removed by evaporation, compound **2** was obtained as a yellow powder (10.5 g, 99 %), which was used directly in the next step without further purification.

Analytical TLC (silica gel 60), 40 % EtOAc in *n*-hexane, *R<sub>f</sub>* = 0.16; <sup>1</sup>H NMR (300 MHz) δ 7.30 (t, *J* = 8.0 Hz, 1H), 7.04 (d, *J* = 8.2 Hz, 1H), 6.83 (d, *J* = 8.1 Hz, 1H), 5.13 (t, *J* = 2.3 Hz, 1H), 4.80 (AB system, 2H), 3.88 (s, 3H), 3.17–3.12 (m, 1H), 2.54–2.40 (m, 3H), 2.11–2.05 (m, 2H), 1.74–1.72 (m, 1H), 1.00 (s, 3H);

$^{13}\text{C}$  NMR (100 MHz)  $\delta$  174.0, 163.1, 157.9, 146.3, 129.0, 125.2, 125.1, 117.1, 108.3, 70.5, 62.2, 55.5, 36.8, 36.7, 32.6, 27.9, 21.9, 18.2; IR ( $\text{CH}_2\text{Cl}_2$ ) 1757, 1682  $\text{cm}^{-1}$ .

### Preparation of Compound 3

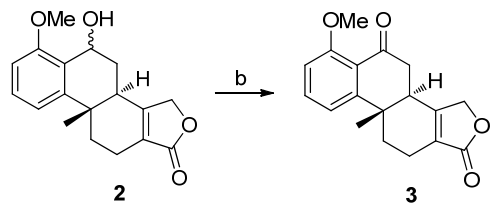

Compound 3 was prepared in accordance with or by slight modification of the method disclosed in Gao, Q.; Xue, J.; Zheng, B.; Liu, R. (Shanghai Haoyuan Chemexpress Co., Ltd., P.R. China), Patent application CN101638426 (2010), p. 13.

Compound 2 prepared in the previous step (10.5 g, 35.0 mmol, crude), 2-iodoxybenzoic acid (IBX, 14.8 g, 52.8 mmol) and acetone (120 mL) were heated under reflux. The reaction was monitored by TLC (EtOAc: Hexane = 3:7 twice). After 6 h, the mixture was cooled and the solid was removed by filtration and washed with  $\text{CH}_2\text{Cl}_2$ . The combined organic layer was dried over anhydrous  $\text{Na}_2\text{SO}_4$ . After solvent removal, crude compound 3 (10.2 g, 98 %) was obtained and was directly used for next step without further purification.

Analytical TLC (silica gel 60), *n*-Hexane: $\text{CH}_2\text{Cl}_2$ :EtOAc = 3:1:1,  $R_f$  = 0.1;  $^1\text{H}$  NMR (300 MHz)  $\delta$  7.51 (t,  $J$  = 8.2 Hz, 1H), 7.05 (d,  $J$  = 7.7 Hz, 1H), 6.95 (d,  $J$  = 8.4 Hz, 1H), 4.70 (AB system, 2H), 3.93 (s, 3H), 3.15–3.09 (m, 1H), 2.81 (dd,  $J$  = 6.0, 18.2 Hz, 1H), 2.63 (dd,  $J$  = 18.2, 13.7 Hz, 1H), 2.64–2.55 (m, 1H), 2.54–2.50 (m, 1H), 2.50–2.28 (m, 1H), 1.84 (td,  $J$  = 12.5, 7.3 Hz, 1H), 1.13 (s, 3H);  $^{13}\text{C}$  NMR (75 MHz)  $\delta$  194.6, 173.4, 160.5, 160.1, 153.5, 134.8, 125.8, 121.1, 115.2, 110.9, 70.1, 56.2, 39.7, 37.8, 36.9, 32.0, 21.4, 17.8; IR ( $\text{CH}_2\text{Cl}_2$ ) 1757, 1682  $\text{cm}^{-1}$ ; LRMS (EI, 20 eV)  $m/z$  298 ( $\text{M}^+$ , 100), 265 (27), 175 (60); HRMS (EI) calcd. for  $\text{C}_{18}\text{H}_{18}\text{O}_4$  ( $\text{M}^+$ )  $m/z$  298.1205, found 298.1215.

### Preparation of Compound 4

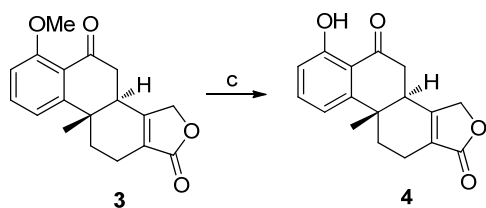

Compound **4** was synthesized in accordance with or by slight modification of the method disclosed in Gao, Q.; Xue, J.; Zheng, B.; Liu, R.; (Shanghai Haoyuan Chemexpress Co., Ltd., PR. China), Patent application CN101638426 (2010), p. 13.

To a solution of compound **3** (10.2 g, 34.2 mmol, crude) in redistilled CH<sub>3</sub>CN (60 mL) was added anhydrous AlCl<sub>3</sub> (14.8 g, 105.6 mmol). The mixture was heated to reflux, and the reaction was monitored by TLC (EtOAc:Hexane = 2:3). After 12 h, 1 M HCl (50 mL) solution was added to the reaction mixture while stirring. The mixture was extracted with CH<sub>2</sub>Cl<sub>2</sub> (300 mL × 3), and the organic layer was filtered *via* short pad of silica gel. After solvent removal by rotary evaporation, yellow solid **4** (8.9 g, 100 %) was obtained, which was used in the next step without further purification.

Analytical TLC (silica gel 60), *n*-Hexane:EtOAc:CH<sub>2</sub>Cl<sub>2</sub> = 1:1:1, *R<sub>f</sub>* = 0.5; <sup>1</sup>H NMR (300 MHz) δ 12.61 (s, 1H), 7.49 (t, *J* = 8.1 Hz, 1H), 6.92 (t, *J* = 7.6 Hz, 2H), 4.78 (AB system, 2H), 3.25–3.21 (m, 1H), 2.81 (d, *J* = 2.7 Hz, 1H), 2.79 (s, 1H), 2.75–2.52 (m, 3H), 1.84 (td, *J* = 12.5, 7.3 Hz, 1H), 1.16 (s, 3H); <sup>13</sup>C NMR (75 MHz) δ 201.9, 173.2, 164.1, 159.5, 152.1, 137.4, 126.2, 117.1, 115.4, 114.2, 69.9, 40.3, 36.7, 36.3, 31.7, 21.8, 17.8; IR (CH<sub>2</sub>Cl<sub>2</sub>) 1763, 1265 cm<sup>-1</sup>; LRMS (EI, 20 eV) *m/z* 284 (M<sup>+</sup>, 100), 269 (17), 187 (35); HRMS (EI) calcd. for C<sub>17</sub>H<sub>16</sub>O<sub>4</sub> (M<sup>+</sup>) *m/z* 284.1049, found 284.1034.

#### Preparation of Compound 5

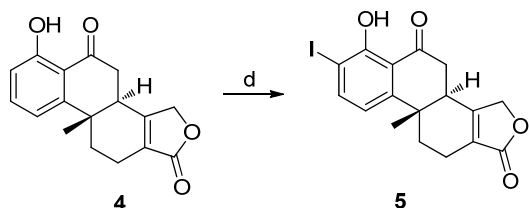

To a solution of **4** (8.9 g, 31.1 mmol) in HOAc (100 mL) were added *N*-iodosuccinimide (7.5 g, 34.4 mmol) and scandium (III) triflate (1.5 g, 3.1 mmol). The resulting suspension was stirred in the absence of light at

room temperature, and the reaction was monitored by TLC (Hexane: EtOAc: CH<sub>2</sub>Cl<sub>2</sub> = 1:1:1). After stirring overnight, the reaction mixture was diluted with Na<sub>2</sub>SO<sub>3</sub> solution (10 g Na<sub>2</sub>SO<sub>3</sub> in 1000 mL water) and mixed at room temperature for 1 h. The product was collected by filtration, washed with water (200 mL × 5) and EtOH/H<sub>2</sub>O (1:1 v/v, 200 mL × 5), dried under vacuum to give product **5** (10.8 g, 82 %) as a light yellow solid.

Analytical TLC (silica gel 60), EtOAc: Hexane: CH<sub>2</sub>Cl<sub>2</sub> = 1:1:1, *R<sub>f</sub>* = 0.50; <sup>1</sup>H NMR (300 MHz, CDCl<sub>3</sub>) δ 13.5 (s, 1H), 7.98 (d, *J* = 8.4 Hz, 1H), 7.01 (d, *J* = 8.4 Hz, 1H), 4.77 (AB system, 2H), 3.14 (d, *J* = 13.6 Hz, 1H), 2.83 (dd, *J* = 6.0, 18.3 Hz, 1H), 2.72–2.58 (m, 2H), 2.57–2.40 (m, 2H), 1.88–1.78 (m, 1H), 1.14 (s, 3H); <sup>13</sup>C NMR (75 MHz, CDCl<sub>3</sub>) δ 193.5, 173.1, 160.8, 159.5, 153.1, 144.1, 126.4, 125.9, 120.9, 69.9, 62.4, 39.5, 37.4, 36.9, 31.9, 21.4, 17.7; HRMS (EI) calcd. for C<sub>17</sub>H<sub>15</sub>IO<sub>4</sub> (M<sup>+</sup>) *m/z* 410.0015; found 410.0007.

#### Preparation of Compound 6

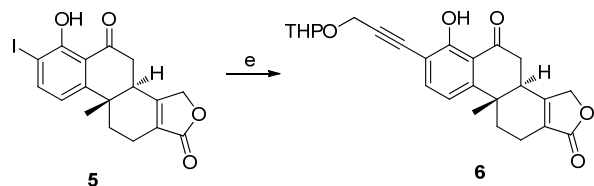

Pd(PPh<sub>3</sub>)<sub>2</sub>Cl<sub>2</sub> (685 mg, 0.97 mmol), CuI (372 mg, 1.95 mmol) and alkyne (1.02 g, 7.31 mmol) were added to a 250 mL round-bottom flask, evacuated by vacuum and filled with argon. Dry THF (100 mL) was injected to a round-bottom flask under argon atmosphere. Compound **5** (2.0 g, 4.88 mmol) was added to the above solution, and the distilled triethylamine (3.5 mL) was finally added. The resulting mixture was stirred at 35 °C until compound **5** was consumed as determined by TLC (EtOAc: Hexane = 1:4). Upon completion, the mixture was allowed to cool to room temperature, filtered through silica gel to desalt, and washed with EtOAc/CH<sub>2</sub>Cl<sub>2</sub> (1:1, v/v, 250 mL). Removal of solvent under reduced pressure afforded a residue, which was purified by flash chromatography to afford arylated alkyne **6** as a solid (2.0 g, 97 %).

Analytical TLC (silica gel 60), EtOAc: Hexane = 1:4, *R<sub>f</sub>* = 0.25; <sup>1</sup>H NMR (300 MHz, CDCl<sub>3</sub>) δ 13.15 (s, 1H), 7.64 (d, *J* = 8.0 Hz, 1H), 6.92 (d, *J* = 8.0 Hz, 1H), 4.94 (t, *J* = 3.4 Hz, 1H), 4.77 (AB system, 2H), 4.55 (t, *J* = 5.3 Hz, 2H), 3.89–3.72 (m, 1H), 3.62–3.58 (m, 1H), 3.25–3.21 (m, 1H), 2.83 (d, *J* = 9.1 Hz, 2H),

2.75–2.52 (m, 3H), 1.90–1.45 (m, 7H), 1.15 (s, 3H);  $^{13}\text{C}$  NMR (75 MHz,  $\text{CDCl}_3$ )  $\delta$  201.8, 173.0, 164.5, 159.1, 152.4, 140.6, 126.2, 115.1, 114.0, 111.8, 96.9, 90.8, 80.1, 69.9, 62.0, 54.9, 40.1, 36.9, 36.3, 31.5, 30.3, 25.4, 21.6, 19.0, 17.7; HRMS (EI) calcd. for  $\text{C}_{25}\text{H}_{26}\text{O}_6$  ( $\text{M}^+$ )  $m/z$  422.1729; found 422.1729.

### Preparation of Compound 7

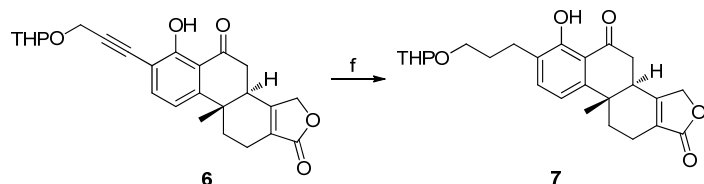

Compound **6** (400 mg, 0.95 mmol) in ethanol (50 mL) was hydrogenolyzed in the presence of triethylamine (0.6 mL, 4.29 mmol) and 5% Pd/C (400 mg) using a balloon filled with  $\text{H}_2$  gas at room temperature. After 12 h, the mixture was heated to 45–50 °C for 2 h. The mixture was filtered through silica gel, washed with EtOAc: $\text{CH}_2\text{Cl}_2$  (1:1, v/v, 100 mL  $\times$  2), and the filtrate was concentrated to give product **7** without further purification (400 mg, 100 %).

Analytical TLC (silica gel 60), EtOAc: Hexane = 1:4,  $R_f$  = 0.30;  $^1\text{H}$  NMR (300 MHz,  $\text{CDCl}_3$ )  $\delta$  12.93 (s, 1H), 7.38 (d,  $J$  = 7.8 Hz, 1H), 6.92 (d,  $J$  = 7.8 Hz, 1H), 4.77 (AB system, 2H), 4.59 (t,  $J$  = 4.2 Hz, 1H), 3.89–3.72 (m, 2H), 3.56–3.38 (m, 2H), 3.17–3.13 (m, 1H), 2.82–2.72 (m, 4H), 2.60–2.30 (m, 3H), 1.95–1.62 (m, 6H), 1.59–1.52 (m, 3H), 1.45 (s, 3H);  $^{13}\text{C}$  NMR (75 MHz,  $\text{CDCl}_3$ )  $\delta$  202.1, 162.2, 159.6, 149.5, 137.2, 129.6, 126.1, 115.2, 113.4, 112.0, 98.9, 69.9, 67.0, 62.3, 40.3, 36.4, 36.3, 31.6, 30.7, 29.0, 26.0, 25.4, 21.7, 19.6, 17.7; HRMS (EI) calcd. for  $\text{C}_{25}\text{H}_{30}\text{O}_6$  ( $\text{M}^+$ )  $m/z$  426.2042; found 426.2042.

### Preparation of Compound 8

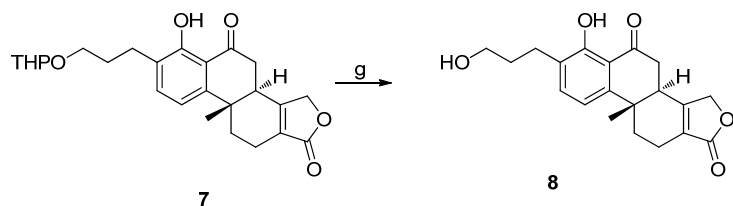

To a solution of compound **7** (400 mg, 0.95 mmol) in methanol (50 mL) was added TsOH· $\text{H}_2\text{O}$  (72 mg, 0.38 mmol). The reaction mixture was stirred at room temperature and monitored by TLC (EtOAc:Hexane



= 1:4). After 2 h, the solvent was evaporated under vacuum. The residue was dissolved in 100 mL of dichloromethane, washed with brine (30 mL × 3), and dried over anhydrous Na<sub>2</sub>SO<sub>4</sub>. The solvent was removed by evaporation, and product **8** (308 mg, 95%) was obtained as a yellow powder, which was purified by flash column chromatography.

Analytical TLC (silica gel 60), EtOAc: Hexane = 1:4, R<sub>f</sub> = 0.15; <sup>1</sup>H NMR (300 MHz, CDCl<sub>3</sub>) δ 15.05 (s, 1H), 7.39 (d, *J* = 7.8 Hz, 1H), 6.89 (d, *J* = 7.8 Hz, 1H), 4.80–4.76 (m, 2H), 3.66 (t, *J* = 6.0 Hz, 2H), 3.20–3.16 (m, 1H), 2.82–2.73 (m, 4H), 2.60–2.40 (m, 3H), 1.92–1.83 (m, 4H), 1.15 (s, 3H); <sup>13</sup>C NMR (75 MHz, CDCl<sub>3</sub>) δ 202.2, 162.1, 159.5, 149.8, 137.6, 129.3, 126.1, 118.2, 114.8, 113.8, 69.9, 61.7, 40.4, 36.5, 36.3, 32.4, 31.6, 25.1, 21.7, 17.7; HRMS (EI) calcd. for C<sub>20</sub>H<sub>22</sub>O<sub>5</sub> (M<sup>+</sup>) *m/z* 342.1467; found 342.1462.

#### Preparation of Compound 9

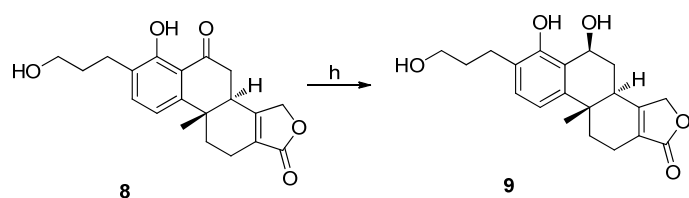

Compound **8** (500 mg, 1.46 mmol) was stirred in the mixture of ethanol (20 mL) and CH<sub>2</sub>Cl<sub>2</sub> (5 mL), and treated with NaBH<sub>4</sub> (110 mg, 2.92 mmol). After 2 h, the reaction mixture was concentrated, dissolved in 1 M HCl (5 mL) and extracted with CH<sub>2</sub>Cl<sub>2</sub> (30 mL × 3), then the organic layer was washed with saturated NaCl solution (30 mL × 1), dried over NaSO<sub>4</sub>, filtered and concentrated to give colorless crude product **9** (500 mg, 99 %), which has high purity for next step.

Analytical TLC (silica gel 60), EtOAc: Hexane = 4:1, R<sub>f</sub> = 0.40; <sup>1</sup>H NMR (300 MHz, DMSO-*d*<sub>6</sub>) δ 9.50 (br s, 1H), 6.98 (d, *J* = 7.9 Hz, 1H), 6.81 (d, *J* = 8.0 Hz, 1H), 6.50 (br, s, 1H), 5.00 (t, *J* = 7.9 Hz, 1H), 4.89 (AB system, 2H), 4.40 (br s, 1H), 3.41 (t, *J* = 6.6 Hz, 2H), 2.81 (d, *J* = 13.1 Hz, 1H), 2.60–2.40 (m, 3H), 2.38–2.12 (m, 3H), 1.95–1.80 (m, 1H), 1.71–1.59 (m, 2H), 1.54 (td, *J* = 11.4, 6.8 Hz, 1H), 1.02 (s, 3H); <sup>13</sup>C NMR (75 MHz, DMSO-*d*<sub>6</sub>) δ 173.2, 163.4, 154.6, 143.7, 128.5, 126.3, 123.0, 122.2, 114.7, 70.4, 67.9, 60.5, 36.0 (2C), 32.5, 32.1, 29.3, 25.7, 22.8, 17.7; HRMS (EI) calcd. for C<sub>20</sub>H<sub>22</sub>O<sub>4</sub> (M<sup>+</sup>-H<sub>2</sub>O) *m/z* 326.1518; found 326.1522.

### Preparation of Compound **10**

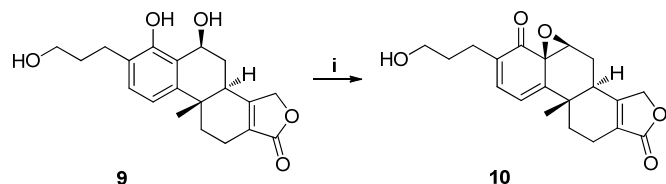

To a solution of compound **9** (100 mg, 0.29 mmol) in methanol (5 mL) at 0°C was added a solution of NaIO<sub>4</sub> (93 mg, 0.43 mmol, in 1.0 mL distilled water). The reaction flask was covered with aluminum foil and the reaction was stirred at room temperature and monitored by TLC (EtOAc: Hexane = 4:1). A yellow solution with white precipitate was obtained. After 2 h, the precipitate was filtered by a short silica gel column and rinsed with EtOAc:CH<sub>2</sub>Cl<sub>2</sub> (1:1, v/v, 200 mL). The combined filtrates were concentrated, and the residue was separated with flash chromatography to give compound **10** as a solid (80 mg, 80 %).

Analytical TLC (silica gel 60), EtOAc: Hexane= 4:1,  $R_f$ = 0.30; <sup>1</sup>H NMR (300 MHz, CDCl<sub>3</sub>)  $\delta$  7.06 (d,  $J$  = 6.6 Hz, 1H), 6.40 (d,  $J$  = 6.6 Hz, 1H), 4.70 (AB system, 2H), 4.08 (d,  $J$  = 5.3 Hz, 1H), 3.61 (t,  $J$  = 6.3 Hz, 2H), 2.62–2.57 (m, 1H), 2.50–2.40 (m, 3H), 2.40–2.24 (m, 2H), 2.24–2.06 (m, 2H), 1.90–1.72 (m, 4H), 1.16 (s, 3H); <sup>13</sup>C NMR (75 MHz, CDCl<sub>3</sub>)  $\delta$  194.9, 172.9, 159.6, 151.0, 138.5, 135.8, 125.3, 120.7, 69.8, 66.9, 61.5, 57.0, 43.7, 38.3, 32.8, 31.6, 29.6, 24.8, 24.2, 17.5; HRMS (EI) calcd. for C<sub>20</sub>H<sub>22</sub>O<sub>5</sub> (M<sup>+</sup>)  $m/z$  342.1467; found 342.1462.

### Preparation of Compounds **11** and **12**

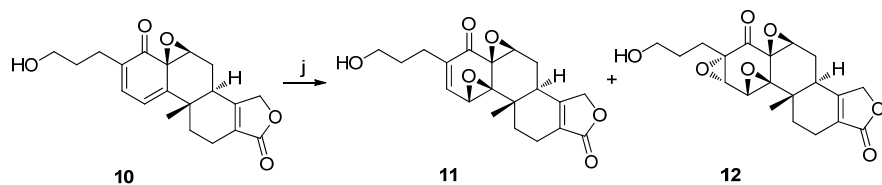

To a solution of crude compound **10** (240 mg, 0.701 mmol) in acetonitrile (15 mL) was added an aqueous Na<sub>2</sub>(EDTA) solution (4 × 10<sup>-4</sup> mol/L, 10 mL). The resulting homogeneous solution was cooled to 0–1°C, followed by the addition of 1,1,1-trifluoroacetone (4.0 mL) in a pre-cooled syringe. To this homogeneous solution was added in portions a mixture of sodium bicarbonate (765 mg, 7.22 mmol) and OXONE (1.73 g, 5.63 mmol) over the period of 1 h (pH 7.0–7.4). The reaction was monitored by TLC (EtOAc: Hexane

= 1:1, v/v). When the reactant was consumed, the mixture was poured into water (30 mL), and extracted with dichloromethane (60 mL  $\times$  3). The organic extracts were dried with anhydrous Na<sub>2</sub>SO<sub>4</sub>, filtered, and concentrated to give a yellow oil for the following step without further purification. Due to the similar polarity of two products **11** and **12** on TLC (80% EtOAc in Hexane as developing solution, R<sub>f</sub> = 0.2) and the instability of product **12** under basic conditions, products **11** and **12** could be directly used for next step without further purification.

#### Preparation of Compounds **13** and **14**

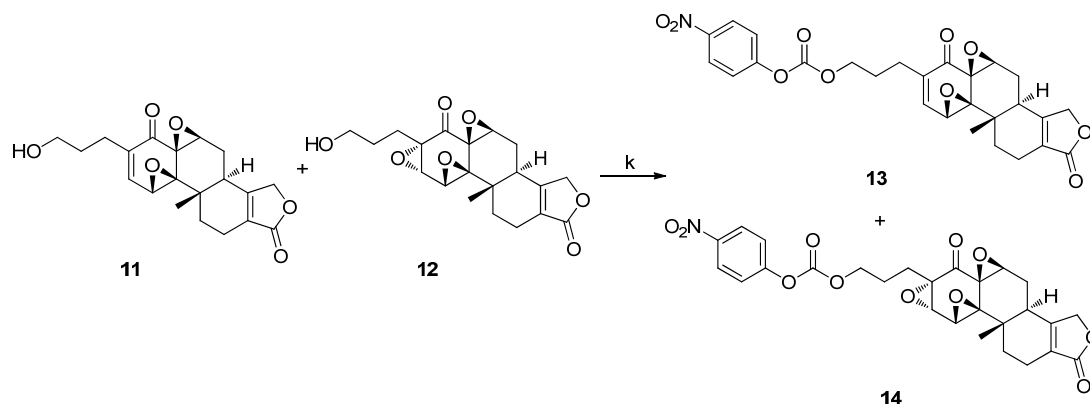

To a solution of the mixture of crude compounds **11** and **12** obtained in the previous procedure in dry THF (10 mL) were added 4-nitrophenyl chloroformate (283 mg, 1.402 mmol) and 113  $\mu$ L of pyridine. The reaction mixture was stirred under argon at room temperature and monitored by TLC (EtOAc: Hexane = 1:1, v/v). When the reactant was consumed, the solvent was evaporated under vacuum and the residue was dissolved in 100 mL dichloromethane, washed with saturated NaHCO<sub>3</sub> solution (30 mL  $\times$  3) and brine (30 mL  $\times$  3). The organic layer was dried over anhydrous Na<sub>2</sub>SO<sub>4</sub> and the solvent was then removed. The crude product was purified by flash chromatography. Evaporation of solvents yielded compounds **13** (140 mg, 39% yield for 2 steps) and **14** (50 mg, 13% yield for 2 steps) as a colorless solid.

Compound **13**: analytical TLC (silica gel 60), EtOAc: Hexane=5:5, R<sub>f</sub>= 0.125; <sup>1</sup>H NMR (300 MHz, CDCl<sub>3</sub>)  $\delta$  8.28 (d, *J* = 9.1 Hz, 2H), 7.39 (d, *J* = 9.1 Hz, 2H), 7.08 (d, *J* = 4.6 Hz, 1H), 4.69 (AB system, 2H), 4.28 (t, *J* = 6.4 Hz, 2H), 3.83 (d, *J* = 4.7 Hz, 1H), 3.62 (d, *J* = 5.7 Hz, 1H), 2.75 (d, *J* = 13.5 Hz, 1H), 2.42–2.40 (m, 1H), 2.39–2.25 (m, 2H), 2.22–2.10 (m, 2H), 2.08–1.84 (m, 3H), 1.68 (dd, *J* = 4.5, 12.5 Hz, 1H), 1.27

(dt,  $J = 6.0, 12.1$  Hz, 1H), 1.12 (s, 3H);  $^{13}\text{C}$  NMR (75 MHz,  $\text{CDCl}_3$ )  $\delta$  190.8, 173.1, 159.5, 155.4, 152.3, 145.4, 142.9, 140.0, 125.7 (2C), 125.3, 121.7 (2C), 69.9, 68.4, 64.2, 62.3, 60.9, 51.4, 40.8, 35.0, 30.0, 26.1, 25.9, 23.4, 17.0, 13.7; HRMS (EI) calcd. for  $\text{C}_{20}\text{H}_{22}\text{O}_6$  ( $\text{M}^+ - \text{NO}_2\text{C}_6\text{H}_5\text{OCO} + \text{H}$ )  $m/z$  358.1411, found 358.1416.

Compound **14**: analytical TLC (silica gel 60), EtOAc: Hexane=5:5,  $R_f = 0.25$ ;  $^1\text{H}$  NMR (500 MHz,  $\text{CDCl}_3$ )  $\delta$  8.28 (d,  $J = 9.2$  Hz, 2H), 7.39 (d,  $J = 9.2$  Hz, 2H), 4.71 (AB system, 2H), 4.30 (t,  $J = 6.3$  Hz, 2H), 4.08 (d,  $J = 2.7$  Hz, 1H), 3.91 (d,  $J = 2.7$  Hz, 1H), 3.45 (d,  $J = 5.4$  Hz, 1H), 2.82 (d,  $J = 13.2$  Hz, 1H), 2.40–2.30 (m, 1H), 2.21–2.01 (m, 3H), 1.99–1.92 (m, 2H), 1.90–1.85 (m, 2H), 1.62 (dd,  $J = 4.5, 12.5$  Hz, 1H), 1.27 (dt,  $J = 6.0, 12.1$  Hz, 1H), 1.12 (s, 3H);  $^{13}\text{C}$  NMR (125 MHz,  $\text{CDCl}_3$ )  $\delta$  197.1, 173.0, 159.3, 155.4, 152.4, 145.5, 125.8, 125.3 (2C), 121.8 (2C), 69.9, 68.5, 65.3, 63.0, 61.4, 60.7, 55.9, 40.6, 35.4, 30.6, 29.7, 25.3, 23.6, 23.2, 17.1, 13.8; LRMS (ESI)  $m/z$  562.1 ( $\text{M}^+ + \text{Na}$ ).

#### Preparation of Compound **15**

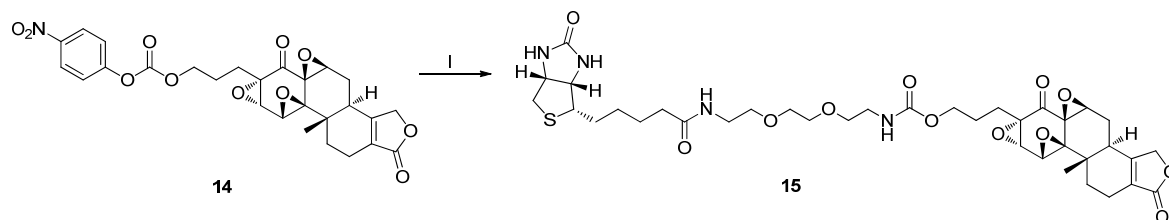

To a solution of biotin-amine (30 mg, 0.0802 mmol) in  $\text{CH}_2\text{Cl}_2$  (4 mL)/ $\text{CH}_3\text{OH}$  (1 mL) was added compound **14** (20 mg, 0.037 mmol), followed by  $\text{Et}_3\text{N}$  (11  $\mu\text{L}$ , 0.0802 mmol) and DMAP (1 mg, 0.00802 mmol). The mixture was stirred at rt overnight. After that, the mixture was concentrated and purified by column chromatography to give compound **15** as a white solid (10 mg, 24 %).

$^1\text{H}$  NMR (500 MHz,  $\text{CDCl}_3$ )  $\delta$  6.41 (br s, 1H), 5.81 (br s, 1H), 5.54 (br s, 1H), 5.17 (br s, 1H), 4.98–4.69 (m, 2H), 4.49 (t,  $J = 4.9$  Hz, 1H), 4.33 (t,  $J = 4.7$  Hz, 1H), 4.10–4.08 (m, 2H), 3.92 (d,  $J = 2.6$  Hz, 1H), 3.62–3.55 (m, 8H), 3.49–3.43 (m, 3H), 3.42–3.36 (m, 2H), 3.19–3.14 (m, 1H), 2.92 (dd,  $J = 4.9, 12.9$  Hz, 1H), 2.85–2.81 (m, 1H), 2.73 (d,  $J = 12.9$  Hz, 1H), 2.39–2.35 (m, 1H), 2.27–2.08 (m, 4H), 2.04–1.95 (m, 2H), 1.77–1.51 (m, 8H), 1.49–1.39 (m, 3H), 1.37–1.29 (m, 1H), 1.07 (s, 3H);  $^{13}\text{C}$  NMR (125 MHz)  $\delta$  197.3,

173.1, 173.0, 163.3, 159.4, 156.6, 125.8, 70.2, 70.0(4), 69.9(8), 69.9(1), 65.4, 64.1, 63.3, 61.8, 61.1, 60.8, 60.1, 56.2, 55.3, 55.3, 40.8, 40.6, 40.5, 39.2, 35.9, 35.4, 30.6, 29.7, 28.5, 28.1, 25.7, 25.5, 24.1, 23.2, 17.1, 13.9; LRMS (ESI)  $m/z$  797.1 ( $M^+Na$ ).

#### Preparation of Biotin-triptolide (Biotin-TL)

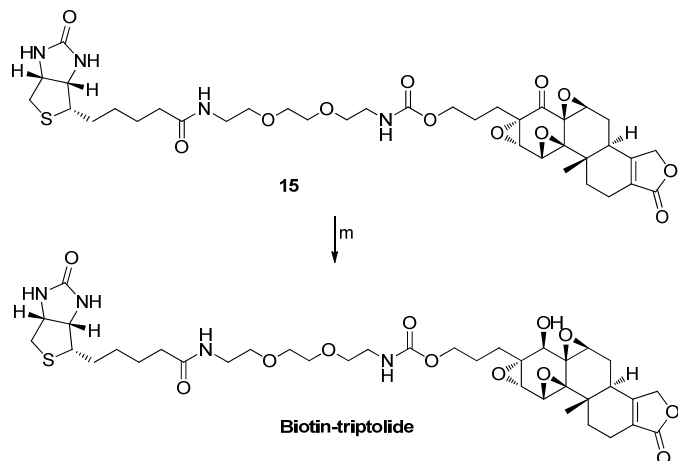

To a solution of compound **15** (10 mg, 0.0129 mmol) in THF (2.5 mL) was added K-Selectride solution (1 M in THF, 50  $\mu$ L, 0.05 mmol) at  $-40$   $^{\circ}$ C. The reaction was stirred for 3 h at  $-40$   $^{\circ}$ C. After completion of reaction, the mixture was concentrated and purified by column chromatography to give biotin-triptolide as a white solid (4 mg, 39 %).

Analytical TLC (silica gel 60),  $CH_2Cl_2$ :  $CH_3OH$  = 9:1,  $R_f$  = 0.15;  $^1H$  NMR (500 MHz,  $CDCl_3+CD_3OD$ )  $\delta$  4.75 (AB system, 2H), 4.51 (dd,  $J$  = 4.9, 7.8 Hz, 1H), 4.32 (dd,  $J$  = 4.6, 8.3 Hz, 1H), 4.14–4.08 (m, 1H), 4.07–4.02 (m, 1H), 3.65–3.62 (m, 5H), 3.61–3.52 (m, 4H), 3.44–3.38 (m, 3H), 3.37–3.34 (m, 3H), 3.20–3.15 (m, 1H), 2.93 (dd,  $J$  = 5.0, 12.9 Hz, 1H), 2.74 (d,  $J$  = 12.8 Hz, 2H), 2.33–2.29 (m, 1H), 2.26–2.20 (m, 3H), 2.19–2.13 (m, 1H), 2.00–1.90 (m, 1H), 1.76–1.53 (m, 9H), 1.48–1.33 (m, 3H), 1.30–1.23 (m, 1H), 1.11 (s, 3H);  $^{13}C$  NMR (125 MHz,  $CDCl_3+CD_3OD$ )  $\delta$  174.3, 164.3, 161.7, 161.2, 157.4, 125.4, 73.5, 70.5, 70.3, 70.0, 69.0, 66.5, 65.7, 64.8, 63.5, 62.4, 62.1, 60.6, 60.3, 56.5, 55.8, 55.3, 40.6, 40.5, 39.7, 39.2, 36.0, 35.9, 30.3, 29.8, 28.6, 28.3, 25.6, 24.3, 23.7, 17.2, 13.7; HRMS (ESI) calcd. for  $C_{37}H_{53}N_4O_{12}S$  ( $M^+H$ )  $m/z$  777.3375, found 777.3380.

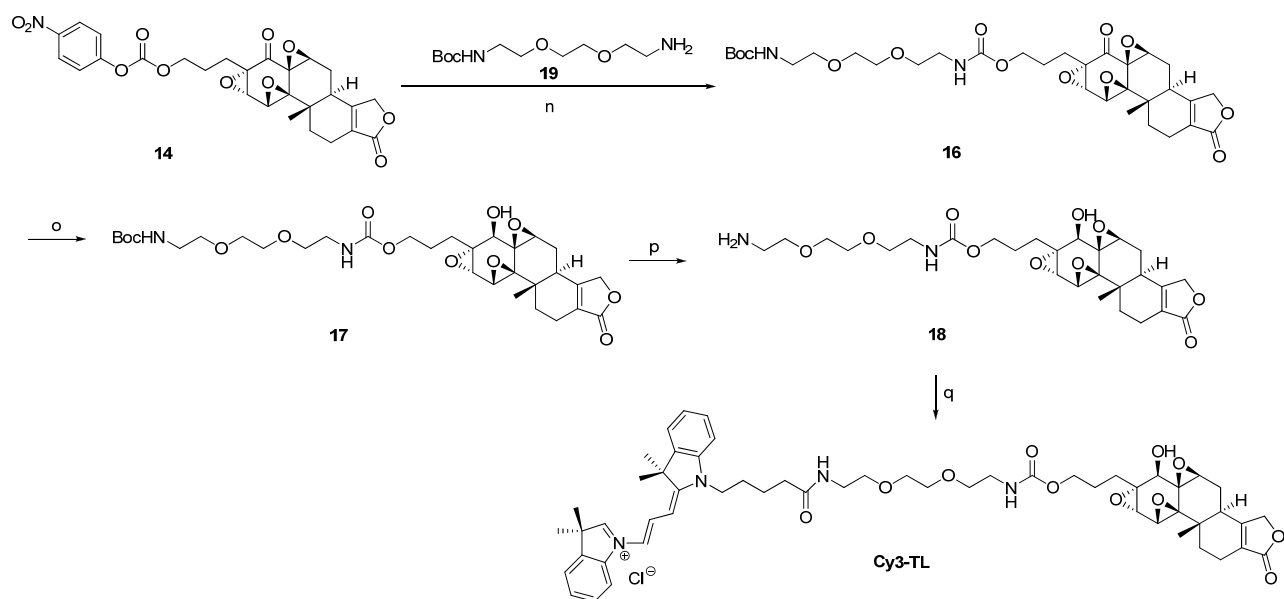

**Scheme S2.** Chemical synthesis of cyanine 3-triptolide (Cy3-TL)

Reagents and conditions: n) DMAP, Et<sub>3</sub>N, CH<sub>2</sub>Cl<sub>2</sub>, rt, 85 %; o) K-Selectride, anhydrous THF, -78 °C; p) 30 % TFA in CH<sub>2</sub>Cl<sub>2</sub> (v/v), rt; q) Cy3-NHS, CH<sub>2</sub>Cl<sub>2</sub>, DMAP, rt, 42 %.

Compound **19** was synthesized according to procedure described in C. Gnaccarini *et al. Bioorg. Med. Chem.* 2009, 17, 6354–6359.

#### Preparation of compound 16

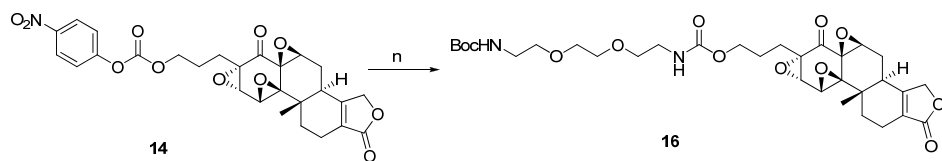

To a mixture of **14** (50 mg, 0.093 mmol) and compound **19** (28 mg, 0.111 mmol) in CH<sub>2</sub>Cl<sub>2</sub> (5 mL) was added one small crystal of DMAP. The reaction mixture was stirred at room temperature overnight under argon, after which time TLC analysis (CH<sub>2</sub>Cl<sub>2</sub>:CH<sub>3</sub>OH = 15:1) indicated the reaction was complete. CH<sub>2</sub>Cl<sub>2</sub> (45 mL) was added to the crude mixture, and the mixture was washed with NaHCO<sub>3</sub> solution until the water layer was colorless. The organic layer was dried over anhydrous Na<sub>2</sub>SO<sub>4</sub> and the solvent was then removed to give a crude product, which was purified by flash column chromatography to afford product **16** as a white solid (51 mg, 85% yield).

Analytical TLC (silica gel 60), 10% MeOH in CH<sub>2</sub>Cl<sub>2</sub>, R<sub>f</sub> = 0.46; <sup>1</sup>H NMR (300 MHz, CD<sub>3</sub>OD) δ 4.85 (AB system, 2H), 4.25 (d, *J* = 2.9 Hz, 1H), 4.09–4.02 (m, 2H), 3.61 (apparent s, 5H), 3.52 (q, *J* = 6.1 Hz, 5H), 3.43 (d, *J* = 5.4 Hz, 1H), 3.30–3.26 (m, 1H), 3.23 (t, *J* = 5.6 Hz, 2H), 2.94–2.90 (m, 1H), 2.38–2.26 (m, 2H), 2.14–2.11 (m, 1H), 1.97–1.89 (m, 2H), 1.82–1.68 (m, 3H), 1.57–1.49 (m, 2H), 1.44 (s, 9H), 1.04 (s, 3H); <sup>13</sup>C NMR (100 MHz, CDCl<sub>3</sub>) δ 197.1, 173.0, 159.4, 156.4, 155.9, 125.6, 79.2, 70.2 (2C), 70.1, 70.0, 69.9 (2C), 65.2, 64.0, 63.2, 61.0, 60.6(2), 60.5(6), 40.7, 40.5, 40.3, 35.3, 30.5, 28.4, 25.5, 24.0, 23.2, 17.0, 13.8 (Boc); LRMS (ESI) *m/z* 671.2 (M<sup>++</sup>Na).

### Preparation of Compound **17**

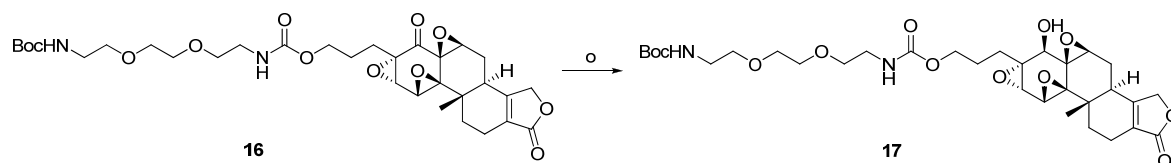

To a solution of compound **16** (51 mg, 0.0787 mmol) in THF (2 mL) at  $-78^{\circ}\text{C}$  under argon atmosphere was added K-Selectride. The reaction was stirred for 2 h, and then the reaction was quenched by saturated NH<sub>4</sub>Cl aqueous solution. The mixture was extracted with dichloromethane (50 mL  $\times$  3) and washed with brine (20 mL  $\times$  3). The organic layer was dried over anhydrous Na<sub>2</sub>SO<sub>4</sub>, filtered, concentrated, and separated by flash column chromatography to afford **17** as a white powder (50 mg, 100%), which was used directly in the following step without further purification.

### Preparation of Compound **18**

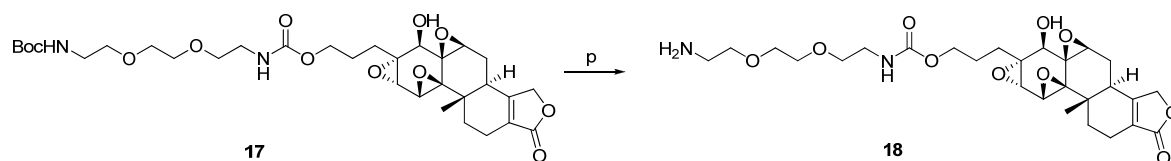

To a solution of compound **17** (50 mg, 0.0768 mmol) in CH<sub>2</sub>Cl<sub>2</sub> (1 mL) was added trifluoroacetic acid (0.3 mL). The reaction mixture was stirred at room temperature for 1 h. Saturated NaHCO<sub>3</sub> solution (5 mL) was added to the mixture and stirred for another 30 min. The resulting mixture was extracted with

dichloromethane, then the organic layer was dried over anhydrous NaSO<sub>4</sub>, filtered, concentrated to give crude product **18** as a yellow oil (50 mg), which was used for the next step without further purification.

#### Preparation of Cyanine 3-TL (Cy3-TL)

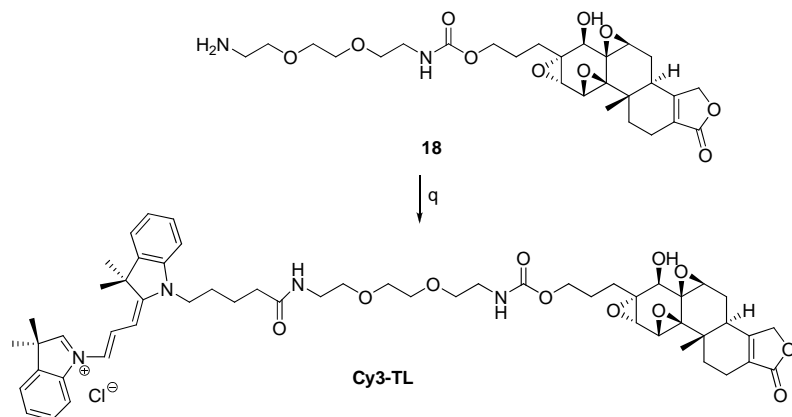

To a solution of compound **18** (15 mg, 0.027 mmol) in CH<sub>2</sub>Cl<sub>2</sub> (1 mL) were added Cy3-NHS (15 mg, 0.023 mmol) and one small crystal of DMAP. The reaction mixture was stirred at room temperature overnight, followed by concentration *in vacuo* and purification by flash column chromatography to afford Cy3-TL as a red solid (10 mg, 42 %).

Analytical TLC (silica gel 60), CH<sub>2</sub>Cl<sub>2</sub>: CH<sub>3</sub>OH = 9:1, R<sub>f</sub> = 0.43; <sup>1</sup>H NMR (400 MHz, CDCl<sub>3</sub>) δ 8.65 (br s, 1H), 8.40 (t, *J* = 13.5 Hz, 1H), 7.50–7.30 (m, 5H), 7.32–7.20 (m, 2H), 7.18–7.11 (m, 3H), 6.02 (br s, 1H), 4.68 (AB system, 2H), 4.20–4.10 (m, 2H), 3.90–3.85 (m, 2H), 3.84 (dd, *J* = 4.8 Hz, 1H), 3.82–3.79 (m, 3H), 3.75–3.71 (m, 1H), 3.64–3.50 (m, 8H), 3.49–3.44 (m, 3H), 3.40–3.33 (m, 4H), 1.69–1.64 (m, 1H), 2.61 (s, 2H), 2.36–2.27 (m, 1H), 2.26–2.05 (m, 2H), 2.00–1.80 (m, 6H), 1.73–1.71 (m, 14H), 1.65–1.58 (m, 1H), 1.53 (dd, *J* = 4.5, 12.0 Hz, 1H), 1.30–1.24 (m, 1H), 1.10–1.07 (m, 3H); <sup>13</sup>C NMR (125 MHz, CDCl<sub>3</sub>) δ 174.3, 173.8, 173.7, 173.3, 160.2, 157.0, 151.0, 142.8, 141.9, 140.6, 140.5, 129.0, 128.9, 125.5, 125.4, 125.3, 122.0, 122.0, 111.2, 110.8, 105.2, 104.6, 73.5, 70.6, 70.3, 70.1(3) (2C), 70.0(8), 70.0, 69.8 (2C), 65.8, 64.0, 62.4, 60.6, 60.2, 56.5, 55.4, 49.0, 48.8, 44.1, 40.8, 40.4, 39.0, 35.8, 35.4, 32.1, 29.8, 28.2, 28.1, 27.1, 23.7, 23.3, 22.6, 17.1, 13.6; HRMS (ESI) calcd. for C<sub>56</sub>H<sub>71</sub>N<sub>4</sub>O<sub>11</sub> (M<sup>+</sup>–Cl) *m/z* 975.5114, found 975.5091.



## General Methods and Materials

**Cell Culture.** MDCK, HeLa, Hela S3 and HEK293T cells were cultured in Dulbecco's modified Eagle's media (Gibco) supplemented with 10% fetal bovine serum (Gibco), 100 U/mL penicillin and 100 µg/mL streptomycin. HCT116 cells were cultured in McCoy's 5A media (Gibco) supplemented with 10% fetal bovine serum, 100 U/mL penicillin and 100 µg/mL streptomycin. Cells were maintained in a humidified 37 °C incubator with 5% CO<sub>2</sub>.

**Target Pull-down Experiment.** Cells were washed with PBS and harvested by trypsinization. After centrifuging, the cell pellets were resuspended in ice-cold lysis buffer (0.1% Triton X-100, 150 mM NaCl, 10% Glycerol, 0.2 U Benzonase, Roche EDTA-free protease inhibitor cocktail, 20 mM Tris-HCl, pH 8.0). The supernatant was filtered through 0.45 µm membrane to remove insoluble fractions. Lysate was then incubated with 5 µM Biotin-TL overnight at 4 °C with rotation. Strep-Tactin Superflow agarose beads (Qiagen) were washed and incubated with the mixture for 2 h at 4 °C. The beads were then washed intensively with lysis buffer. Following elution by incubating with 1 mM biotin, the bound proteins were resolved in SDS-PAGE (10% tris-glycine gel) and visualized by silver stain.

**Expression and Purification of Recombinant Protein.** Full length human Prx I coding sequence was cloned into pTT5SH8Q2 vector for mammalian expression and pET52b for *Escherichia coli* expression, respectively. Human embryonic kidney 293T (HEK293T) cell line was transiently transfected with plasmids using polyethyleneimine (PEI, Polysciences). Cells was harvested 40 h after transfection by centrifugation at 150x g for 5 min. Transfected cells were lysed with lysis buffer (0.1% Triton X-100 in 150 mM NaCl, protease inhibitor cocktail from Roche, 20 mM Tris-HCl, pH 8.0). Proteins for gel filtration and chaperone activity assay were expressed in *E. coli* host cell BL21/DE3 over night at 20 °C in the ZYM-5052 auto-induction medium. After cell lysis and centrifugation, the streptag II-fusion proteins were purified by Strep-Tactin Superflow agarose (Qiagen) followed by tag cleavage using PreScission protease. Then the tag removed recombinant Prx I protein was further purified using anion exchange (Mono Q, GE Healthcare) and gel-filtration chromatography (Superdex 200, GE Healthcare).

**In-gel Fluorescence Scan.** 10  $\mu$ M recombinant Prx I protein was incubated with 4  $\mu$ M Cy3-TL in the absence or presence of triptolide at indicated concentration at 4 °C. The mixture was then resuspended in LDS sample loading buffer (Invitrogen) and resolved on 10% SDS-PAGE. Fluorescence was visualized by scanning the gel using Typhoon 9410 variable mode imager (excitation 546 nm, emission filter 580 nm).

**Western Blot.** 1  $\mu$ M recombinant Prx I protein or its mutant was incubated with 100 nM Biotin-TL at 4 °C for 3 h before SDS-PAGE separation. The resolved proteins were transferred onto a PVDF membrane. After blocking in membrane blocking solution (Invitrogen), proteins were blotted with streptavidin-HRP (Abcam) for detection of biotin-TL or primary antibody rabbit anti-Prx I (Abcam ab41906) and goat anti-rabbit-HRP secondary antibody (Santa Cruz, sc-2030) for detection of Prx I, respectively. The bands were visualized with ECL reagent (Thermo). Western blot intensities were measured using ImageJ. Quantification was performed on band intensities normalized with loading control.

**MALDI-TOF/TOF Analysis.** Gel plugs were destained, washed and then reduced with 10 mM DTT and treated with 55 mM iodoacetamide in the dark to alkylate all reduced cysteines. Then the mixture was diluted with 10 mM ammonium bicarbonate before digestion. 12.5 ng/ $\mu$ L of sequencing grade trypsin (Promega) was added to cover gel plugs and incubated at 4 °C. After 30 minutes, trypsin was removed and replaced with 20  $\mu$ L of 10 mM ammonium bicarbonate and incubated at 37 °C overnight. Digestion was stopped by adding 2 fractions of 5% formic acid/50% acetonitrile and dehydrated with 100% acetonitrile. The extracted peptide mixtures were dried down by SpeedVac and then resuspended in 0.1% formic acid and followed by  $\mu$ C18 ZipTip.

$\alpha$ -Cyano-4-hydroxycinnamic acid (CHCA) was used as the MALDI matrix at a concentration of 10 mg/mL in 50% water/acetonitrile and 0.1% formic Acid. Samples were spotted and dried before applying matrix. All mass spectra were acquired on a 4800 MALDI TOF/TOF Analyzer (ABSciex, Framingham, MA) in positive ion reflector mode. Typical spectra were obtained by averaging 500 acquisitions in Reflector mode and 100-160 acquisitions in MSMS mode with the minimum possible laser energy in order to maintain the best resolution. Precursor ions with a charge state of 1+ were fragmented via post source decay (PSD). Peak

list was generated by Data Explorer (ABSciex, Framingham, MA) and searched using Mascot (version 2.1.0, Matrix Science, London, UK). Database search settings were as follows: +1 monoisotopic peaks were searched with a mass tolerance of 75 ppm for precursor masses;  $\pm 0.2$  Da for MS/MS. Trypsin was selected as the enzyme while allowing one missed cleavage, cysteine carbamidomethylation as fixed modification and methionine oxidation as variable modification. Human taxonomy filter was applied when searching against SwissProt database downloaded on 6<sup>th</sup> January, 2010.

**LC-MS/MS Mass Spectrometry Analysis.** 1  $\mu$ g recombinant Prx I protein incubated with 10  $\mu$ M TL at 4 °C overnight was subjected to in-solution digestion. Following denaturing in 8 M urea, the protein complex was heated, reduced with 4 mM DTT and treated with 8 mM iodoacetamide in dark to alkylate all reduced cysteines. Then the mixture was diluted with 50 mM ammonium bicarbonate to reach final 0.5 M urea before digestion. 50 ng sequencing grade trypsin (Promega) was incubated with the mixture at 37 °C overnight in oven. Digestion was stopped by adding 1% formic acid. The resulting peptides were enriched with OASIS C18 plate (Waters) and eluted in 50% acetonitrile and 5% formic acid. The samples were dried down by SpeedVac and then resuspended in 0.1% formic acid for analysis by LC-MS/MS.

Resultant peptides were analyzed on an ETD equipped Orbitrap Velos instrument (Thermo Fisher Scientific, Bremen) connected to an LC system. The LTQ-Orbitrap Velos instrument was operated in the data-dependent mode to automatically switch between MS and MS/MS. Precursor ions with a charge state of 2+ or higher were fragmented by HCD or ETD under control of an in-house developed Data Dependent Decision Tree<sup>1</sup>. All generated peak lists were searched against IPI human database (ipi.HUMAN.v.3.68.fasta) using Maxquant (version 1.2.2.5). The database search was performed with the following parameters: a mass tolerance of 6 ppm for precursor masses;  $\pm 0.5$  Da for MS/MS, allowing two missed cleavages, cysteine carbamidomethylation as fixed modification and methionine oxidation, triptolide addition (360.1573 Da) as variable modifications. The enzyme was specified as trypsin. A careful manual verification was used to ensure correct peptide identification.

**Native Mass Spectrometry Analysis.** As described previously<sup>2</sup>, aliquots of approximately 2  $\mu$ L of samples

were loaded into gold-plated borosilicate capillaries made in-house (Sutter P-97 puller, Sutter Instruments Co., Novato, CA an Edwards Scancoat six sputter-coater, Edwards Laboratories, Milpitas, CA) for analysis on a LCT 1 mass spectrometer (Waters Corp., Milford, MA). A capillary voltage of 1200 V was applied to allow optimal electrospray, in conjunction with a sampling cone voltage around 125 V. The source backing pressure was elevated in order to promote collisional cooling to approximately 7.5 mbar. A 300 to 10,000 m/z range was scanned to record the spectra. CsI clusters were used to calibrate spectra every day. Data was analyzed by MassLynx 4.1 and further processed with Origin 8.

**Size-exclusion Chromatography.** Size-exclusion chromatography was performed at 4 °C using the fast protein liquid chromatography system (Bio-rad) with a Superdex 200 10/300 GL column (GE). Ribonuclease (13.7 kDa), carbonic anhydrase (29 kDa), ovalbumin (44 kDa), conalbumin (75 kDa), aldolase (158 kDa), ferritin (440 kDa) were used as molecular mass standard markers for calibration of the column. Column was equilibrated at a flow rate of 0.5 ml/min at 4 °C with 20 mM Tris-HCl, pH 8.0 containing 150 mM NaCl. Elution of the recombinant Prx I with or without TL treatment was monitored at 280 nm at a flow rate of 0.5 ml/min.

**Peroxidase Activity Assay.** Peroxidase activity of the Prx I with indicated treatment was measured as described previously.<sup>3</sup> The yTrx and yTrxR recombinant proteins were purchased from Abfrontier. 8 µM Recombinant mammalian cell expressed hPrx I was first incubated with indicated compounds at 4 degree for overnight. To measure enzyme activity, 1 µg was mixed with 2.25 µM yTrx, and 1 µM yTrxR in 100 µL 50 mM Hepes (pH 7.0) containing 200 µM NADPH in 96-well plate. The reaction mixture was incubated at 30 °C for 5 min, followed by the addition of 100 µM H<sub>2</sub>O<sub>2</sub> to start the reaction. NADPH oxidation was monitored for the next 10 min by a decrease in absorbance at 340 nm measured with the plate reader (Beckman Coulter DTX880). Activity measured without Prx I was subtracted as background activity.

**Chaperone Activity Assay.** Molecular chaperone activity was determined by assessing the ability of the recombinant Prx I to inhibit the thermal aggregation of substrate protein MDH. 10 µM of MDH was mixed with 2.5 µM Prx I in absence or presence of test compound, in a degassed buffer (100 mM Tris, 150 mM

KCl, 20 mM Mg(OAc)<sub>2</sub>, pH 7.5) as previously described<sup>4</sup>. The reaction mixture was incubated at 45 °C for 30 min, and the increase of light scattering as a result of thermal aggregation of substrate proteins was monitored by using a DynaPro DLS Plate Reader (Wyatt Technology, Santa Barbara, CA, USA). For data analysis, curves were plotted and fitted using GraphPad Prism software.

Supplementary Data

**Figure S1.** Silver stained gels of pull-down products of Biotin-TL using HeLa, HCT116 and HEK293T cells. Arrows indicate protein bands confirmed as Prx I by MALDI-TOF MS analysis.

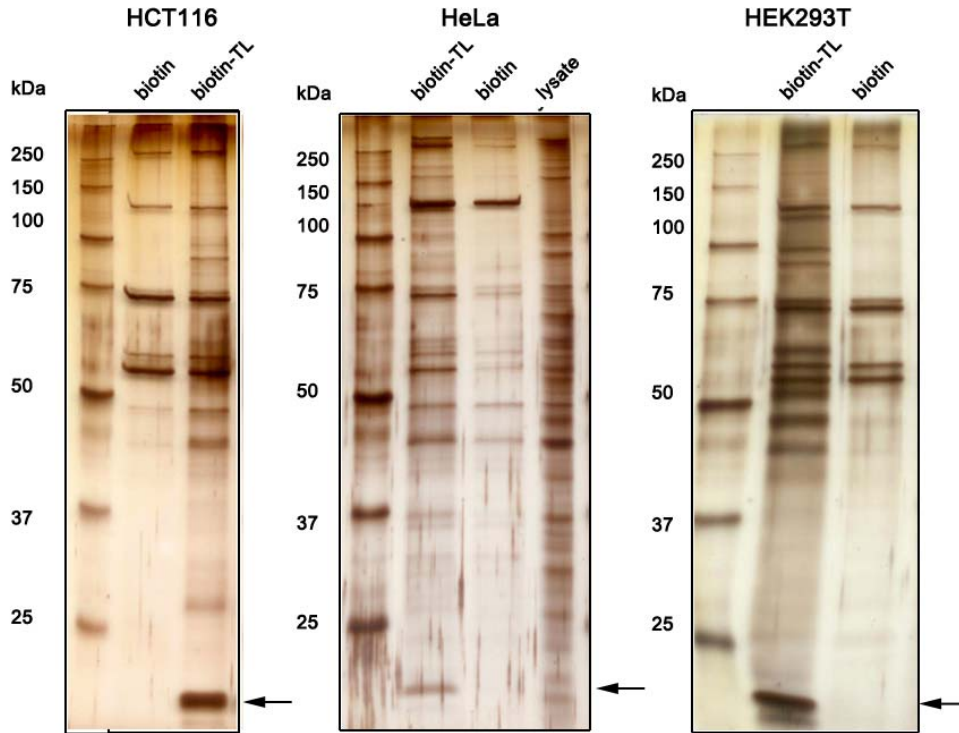

**Figure S2.** A silver stained gel of pull-down products of Biotin-TL in the absence or presence of TL. HeLa cell lysate was incubated with 5  $\mu$ M Biotin-TL in the absence or presence of 500  $\mu$ M TL. Proteins were then purified using streptavidin-conjugated agarose beads, followed by SDS-PAGE analysis. The arrow indicates a band confirmed as Prx I.

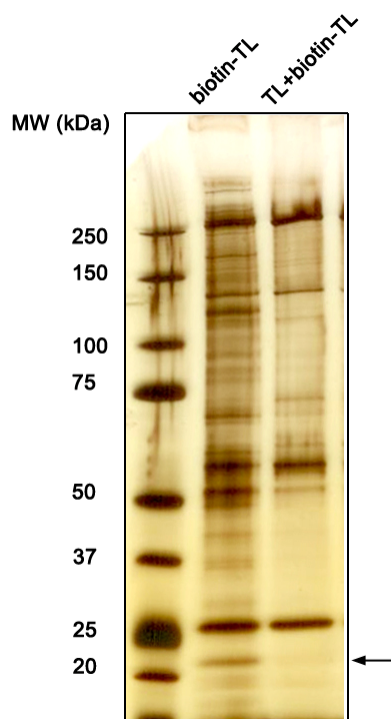

**Figure S3.** MALDI-TOF/MS analysis confirms the identity of 23-kDa protein as Prx I.

The identified peptides are highlighted in red. Mascot protein score= 121, Protein Score C. I. % = 100.

1 MSSGNAK**IGH PAPNFKATAV MPDGQFKDIS LSDYK**GKYVV FFFYPLDFTF  
51 VCPTEIIAFS DRAEEFKKLN CQVIGASVDS HFCHLAWVNT PK**KQGGLGPM**  
101 **NIPLVSDPKR TIAQDYGVLK ADEGISFRGL FIIDDKGILR QITVNDLPVG**  
151 **RSVDETLRLV QAFQFTDKHG** EVCPAGWKPG SDTIKPDVQK SKEYFSKQK



**Figure S4.** SDS-PAGE analysis of recombinant thioredoxin incubated with Cy3-TL. 400 ng Prx I, thioredoxin (Trx) and thioredoxin reductase (TrxR) were incubated with 1  $\mu$ M Cy3-TL at 4 °C for 1 h before SDS-PAGE.

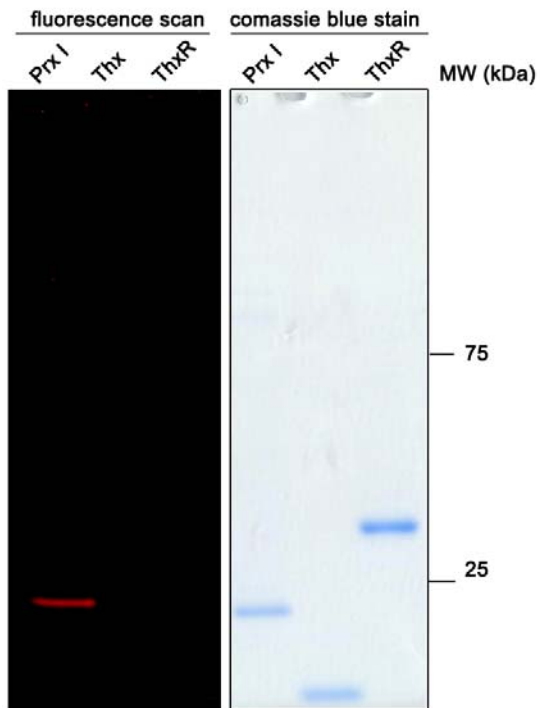

**Figure S5.** Triplicate western blot analyses of recombinant hPrx I and mutants after incubation with Biotin-TL.

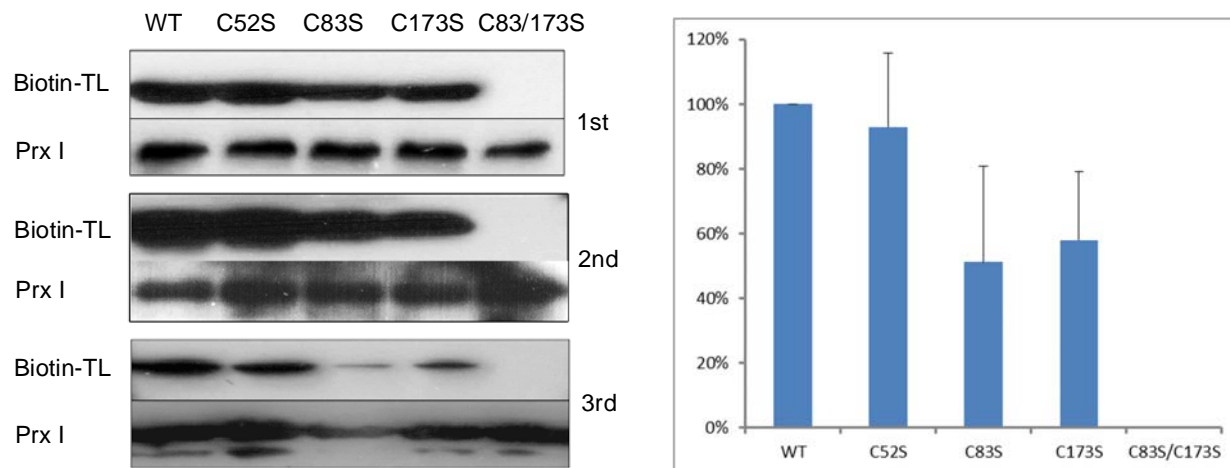

**Figure S6.** Kinetics curves show enzymatic activity of recombinant Prx I, in the presence or absence of TL or adenanthin.

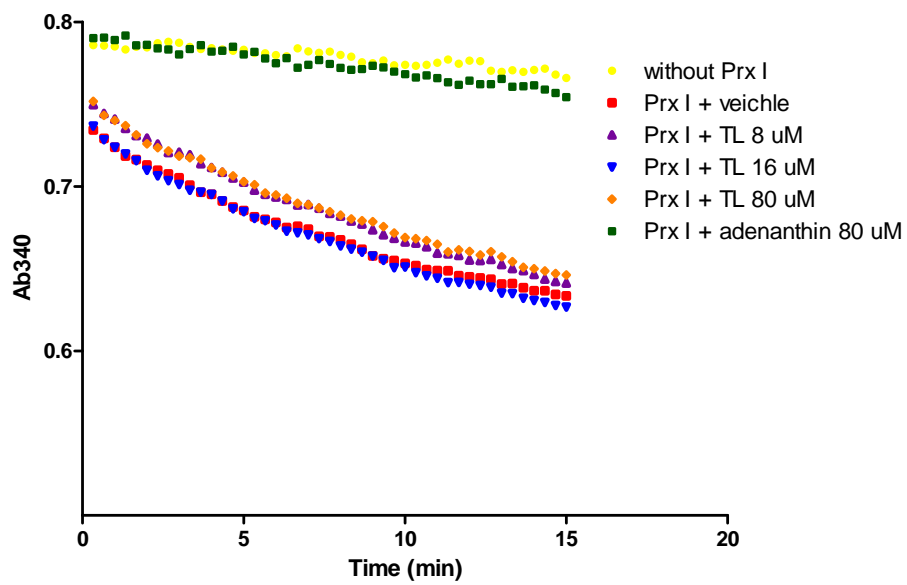

**Figure S7.** Native mass spectrometry analysis on intact wildtype Prx I or mutants in absence or presence of Cel and WA

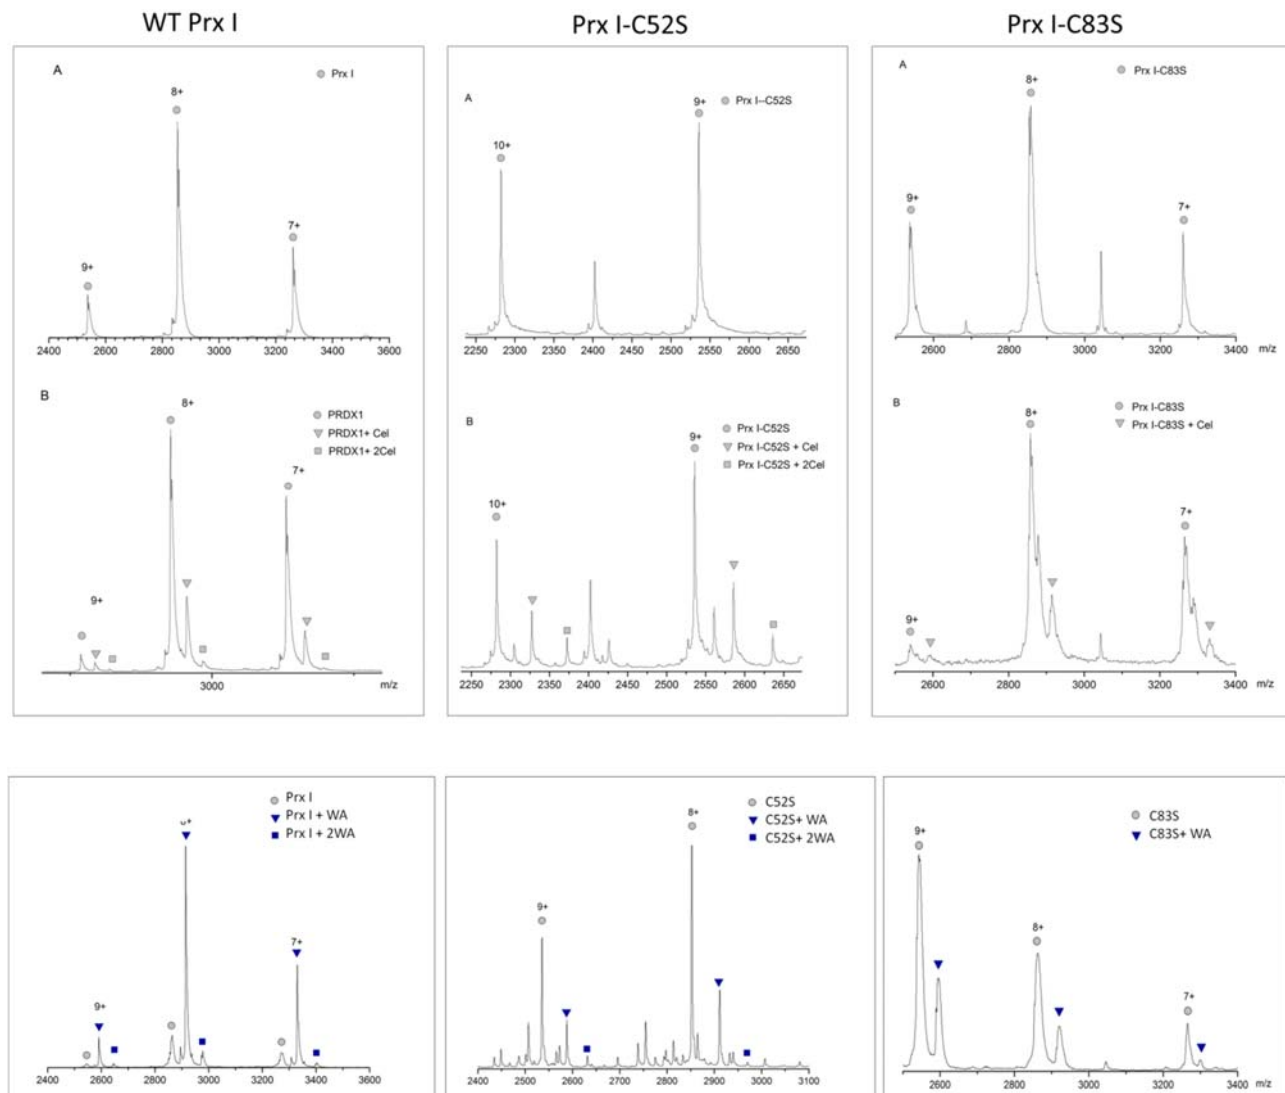

**Figure S8.** LC-MS/MS analysis of tryptic peptide  $^{169}\text{HGEVC}^{\text{WA}}\text{PAGWKPGSDTIKPDVQK}^{190}$  from WA-treated Prx I. The ETD fragment ions are manually checked and annotated.

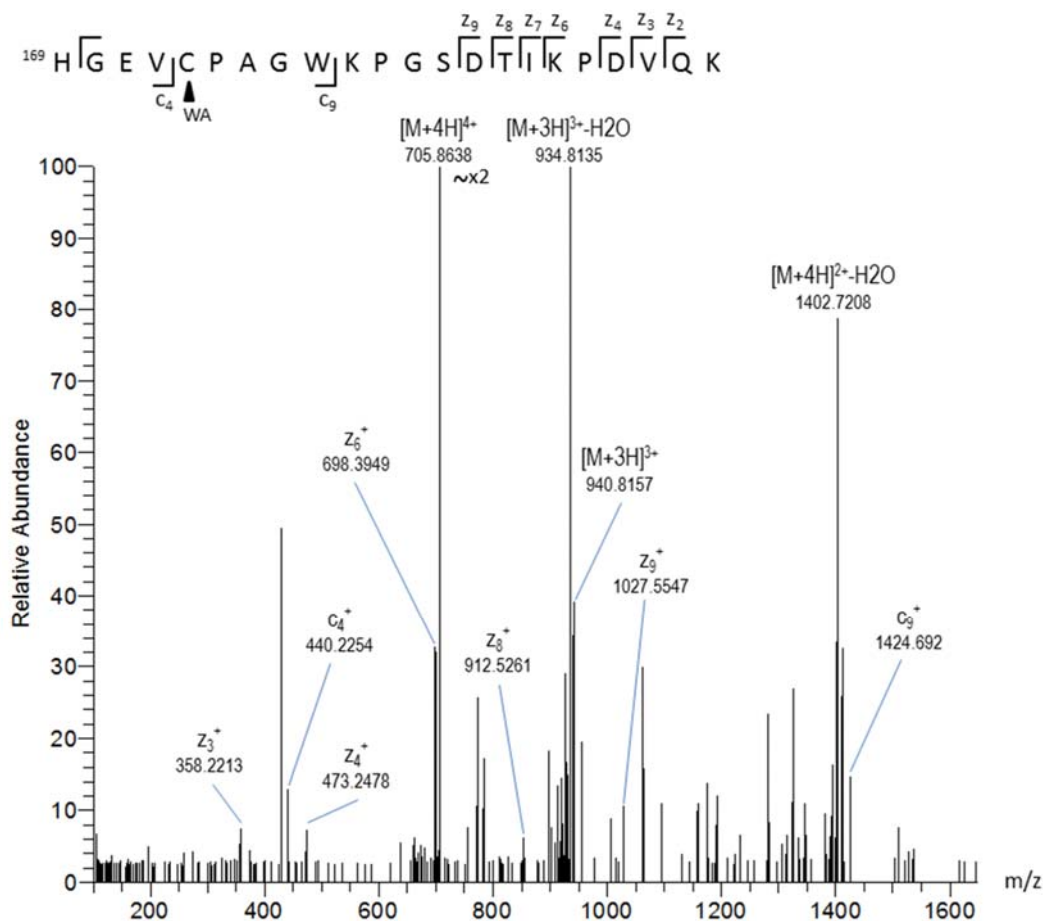

| Assignment                                    | $[\text{M}+\text{H}]^{1+}$ |                     |                |
|-----------------------------------------------|----------------------------|---------------------|----------------|
|                                               | Exact<br>m/z               | Experimental<br>m/z | Error<br>(mmu) |
| <b>z2</b>                                     | 259.1527                   | 259.1525            | -0.2           |
| <b>z3</b>                                     | 358.2211                   | 358.2213            | 0.2            |
| <b>c4</b>                                     | 440.2252                   | 440.2254            | 0.2            |
| <b>z4</b>                                     | 473.2480                   | 473.2478            | -0.2           |
| <b>z6</b>                                     | 698.3957                   | 698.3949            | -0.8           |
| <b>z7</b>                                     | 811.4798                   | 811.4764            | -3.4           |
| <b>z8</b>                                     | 912.5275                   | 912.5261            | -1.4           |
| <b>z9</b>                                     | 1027.5544                  | 1027.5547           | 0.3            |
| <b>c9</b>                                     | 1424.6919                  | 1424.6920           | 0.1            |
| <b><math>[\text{M}+3\text{H}]^{3+}</math></b> | 940.4748                   | 940.4810            | 6.2            |
| <b><math>[\text{M}+4\text{H}]^{4+}</math></b> | 705.6062                   | 705.6129            | 6.7            |

**Figure S9.** Aggregation of MDH in absence of Prx I and in presence of TL, Cel and WA as monitored by light scattering.

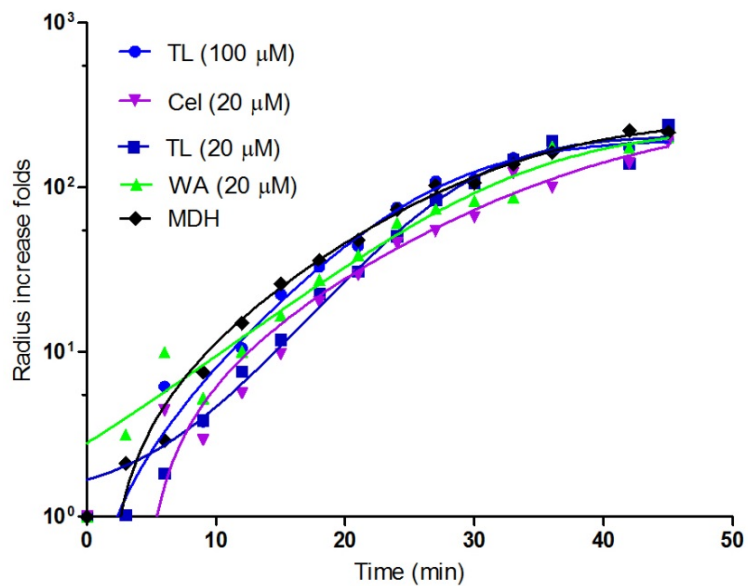

**Figure S10.** Monitoring aggregation of Prx I in absence of MDH and in presence of TL, Cel and WA by light scattering.

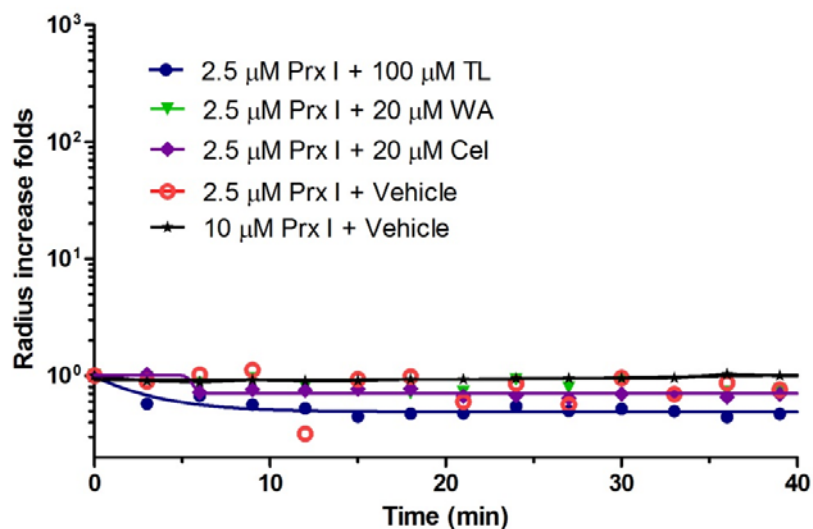

**Table S1.** Observed species in native mass spectrometry analysis of intact Prx I monomer and dimer in absence or presence of TL. hPrx I recombinant protein (10 μM) was incubated with DMSO or 40 μM TL at 4 °C overnight. Unbound small molecules were removed using desalting column before MS analysis.

| Complex Assignment    | Measured Mass   |
|-----------------------|-----------------|
| Prx I (monomer)       | 22823.95 ± 3.32 |
| Prx I + TL (monomer)  | 23183.41 ± 4.93 |
| Prx I + 2TL (monomer) | 23544.55 ± 7.55 |
| Prx I (dimer)         | 45685.39 ± 8.95 |
| Prx I + TL (dimer)    | 46052.46 ± 4.22 |
| Prx I + 2TL (dimer)   | 46402.91 ± 6.64 |

**Table S2.** HCD MS/MS analysis: a summary of the assigned fragment ion peaks in Figure 2a of a quaternary charged tryptic peptide,  $^{169}\text{HGEVCTLPAGWKPGSDTIKPDVQK}^{190}$ , from the TL-treated Prx

I.

| Assignment                                    | $[\text{M}+\text{H}]^{1+}$ |                  |             | $[\text{M}+2\text{H}]^{2+}$ |                  |             |
|-----------------------------------------------|----------------------------|------------------|-------------|-----------------------------|------------------|-------------|
|                                               | Exact m/z                  | Experimental m/z | Error (mmu) | Exact m/z                   | Experimental m/z | Error (mmu) |
| <b>b2</b>                                     | 195.0877                   | 195.0880         | 0.3         |                             |                  |             |
| <b>b3</b>                                     | 324.1302                   | 324.1299         | 0.3         |                             |                  |             |
| <b>b4</b>                                     | 423.1987                   | 423.1981         | -0.6        |                             |                  |             |
| <b>b5</b>                                     | 886.3651                   | 886.3621         | -3.0        |                             |                  |             |
| <b>b6</b>                                     |                            |                  |             | 492.209                     | 492.2197         | 10.7        |
| <b>b7</b>                                     | 1054.4550                  | 1054.4514        | -3.6        |                             |                  |             |
| <b>b8</b>                                     | 1111.4765                  | 1111.4723        | -4.2        |                             |                  |             |
| <b>b9</b>                                     | 1297.5558                  | 1297.5548        | -1.0        |                             |                  |             |
| <b>b10</b>                                    | 1425.6507                  | 1425.6293        | -21.4       |                             |                  |             |
| <b>b14</b>                                    |                            |                  |             | 891.3920                    | 891.3969         | 5.0         |
| <b>b15-H2O</b>                                |                            |                  |             | 932.9106                    | 932.9089         | -1.6        |
| <b>b16-H2O</b>                                |                            |                  |             | 989.4526                    | 989.4588         | 6.3         |
| <b>b16</b>                                    |                            |                  |             | 998.4579                    | 998.4583         | 0.5         |
| <b>y2</b>                                     | 275.1714                   | 275.1701         | -1.3        |                             |                  |             |
| <b>y3</b>                                     | 374.2398                   | 374.2397         | -0.1        |                             |                  |             |
| <b>y5</b>                                     | 586.3195                   | 586.3205         | 1.0         |                             |                  |             |
| <b>y5-H2O</b>                                 | 568.3089                   | 568.3098         | 0.9         |                             |                  |             |
| <b>y6</b>                                     | 714.4145                   | 714.4135         | -1.0        |                             |                  |             |
| <b>y7</b>                                     | 827.4985                   | 827.5103         | 11.8        |                             |                  |             |
| <b>y8</b>                                     |                            |                  |             | 464.7731                    | 464.776          | 2.9         |
| <b>y12</b>                                    | 1284.6794                  | 1284.6689        | -10.5       | 642.8397                    | 642.8427         | 3.0         |
| <b>y12-H2O</b>                                |                            |                  |             | 633.8344                    | 633.8408         | 6.4         |
| <b>y13</b>                                    |                            |                  |             | 706.8872                    | 706.8895         | 2.3         |
| <b>y14</b>                                    |                            |                  |             | 799.9269                    | 799.928          | 1.2         |
| <b>y16</b>                                    |                            |                  |             | 863.9562                    | 863.9618         | 5.7         |
| <b>y16-NH3</b>                                |                            |                  |             | 855.4429                    | 855.4129         | -29.9       |
| <b>y17</b>                                    |                            |                  |             | 912.4825                    | 912.4859         | 3.4         |
| <b><math>[\text{M}+4\text{H}]^{4+}</math></b> | 678.0807                   | 678.0865         | 5.8         |                             |                  |             |



**Table S3.** HCD MS/MS analysis: summary of the assigned fragment ion peaks in Figure 4d of a tryptic peptides, <sup>79</sup>DSHFC<sup>WA</sup>HLAWVNTPK<sup>92</sup>, from the WA-treated Prx I.

| Assignment                                    | [M+H] <sup>1+</sup> |                  |             | [M+2H] <sup>2+</sup> |                  |             |
|-----------------------------------------------|---------------------|------------------|-------------|----------------------|------------------|-------------|
|                                               | Exact m/z           | Experimental m/z | Error (mmu) | Exact m/z            | Experimental m/z | Error (mmu) |
| <b>y2</b>                                     | 244.1656            | 244.165543       | -0.1        | 122.5864             |                  |             |
| <b>y3</b>                                     | 345.2132            | 345.212891       | -0.3        | 173.1102             |                  |             |
| <b>y4</b>                                     | 459.2562            | 459.256042       | -0.2        | 230.1317             |                  |             |
| <b>y5</b>                                     | 558.3246            | 558.32489        | 0.3         | 279.6659             |                  |             |
| <b>y6</b>                                     | 744.4039            | 744.403564       | -0.3        | 372.70555            |                  |             |
| <b>y7</b>                                     | 815.4410            | 815.440308       | -0.7        | 408.2241             |                  |             |
| <b>y8</b>                                     | 928.5251            | 928.523926       | -1.2        | 464.76615            | 464.765594       | -0.6        |
| <b>b6-H2O</b>                                 | 1179.5179           |                  |             | 590.2626             | 590.262329       | -0.2        |
| <b>b6</b>                                     | 1197.5285           | 1197.526001      | -2.5        | 599.2679             | 599.267761       | -0.1        |
| <b>b7</b>                                     | 1310.6126           |                  |             | 655.8099             | 655.809387       | -0.5        |
| <b>b8</b>                                     | 1381.6497           |                  |             | 691.3285             | 691.327881       | -0.6        |
| <b>y10</b>                                    | 1638.8600           |                  |             | 819.9336             | 819.93512        | 1.5         |
| <b>b12</b>                                    | 1881.8880           |                  |             | 941.4476             | 941.444153       | -3.4        |
| <b>y12</b>                                    | 1922.9873           |                  |             | 961.99725            | 961.994507       | -2.7        |
| <b>y13-H2O</b>                                | 1992.0088           | 1992.011353      | 2.6         | 996.508              |                  |             |
| [ <b>y13</b> ] <sup>3+</sup>                  | 670.6779            | 670.677124       | -0.8        |                      |                  |             |
| [ <b>M+2H</b> ] <sup>2+</sup>                 | 1063.0268           | 1062.969604      | -57.1       |                      |                  |             |
| [ <b>M+3H</b> ] <sup>3+</sup> -<br><b>H2O</b> | 703.0167            | 703.015503       | -1.2        |                      |                  |             |
| [ <b>M+3H</b> ] <sup>3+</sup>                 | 709.02023           | 709.019836       | -0.4        |                      |                  |             |

## References

1. C. K. Frese, A. F. M. Altelaar, M. L. Hennrich, D. Nolting, M. Zeller, J. Griep-Raming, A. J. R. Heck and S. Mohammed, *J. Proteome Res.*, 2011, **10**, 2377-2388.
2. R. J. Rose, A. F. Labriijn, E. T. J. van den Bremer, S. Loverix, I. Lasters, P. H. C. van Berkel, J. G. J. van de Winkel, J. Schuurman, P. W. H. I. Parren and A. J. R. Heck, *Structure*, 2011, **19**, 1274-1282.
3. J.-A. Kim, S. Park, K. Kim, S. G. Rhee and S. W. Kang, *Anal. Biochem.*, 2005, **338**, 216-223.
4. P. Goloubinoff, A. Mogk, A. P. B. Zvi, T. Tomoyasu and B. Bukau, *PNAS* 1999, **96**, 13732-13737.
